# Supplementary material
Source: publisher figshare collection journal article supplement (https://acs.figshare.com/ndownloader/files/6486000)
Supplement: Supplementary file 1 [file 6486000]

**Supporting Information**

**Cobalt-Catalyzed C(sp<sup>2</sup>)-H Borylation with an Air-Stable, Readily  
Prepared Terpyridine Cobalt(II) Bis(acetate) Precatalyst**

*Nadia G. Léonard, Máté J. Bezdek, and Paul. J. Chirik\**

*Department of Chemistry*

*Princeton University, Princeton NJ 08544, United States*

**Table of Contents**

- I. Additional Spectroscopic Data
- II. Characterization Data for Borylation Products
- III. References

## I. Additional Spectroscopic Data

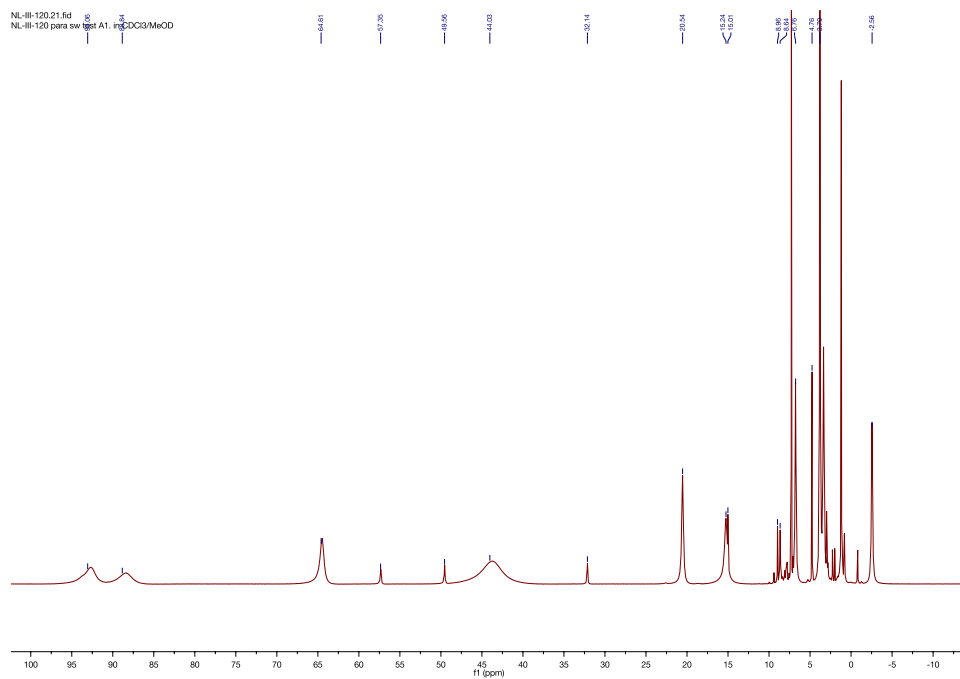

**Figure S1.** CDCl<sub>3</sub> <sup>1</sup>H NMR spectrum of (<sup>4r</sup>Tpy)Co(OAc)<sub>2</sub> at 23 °C.

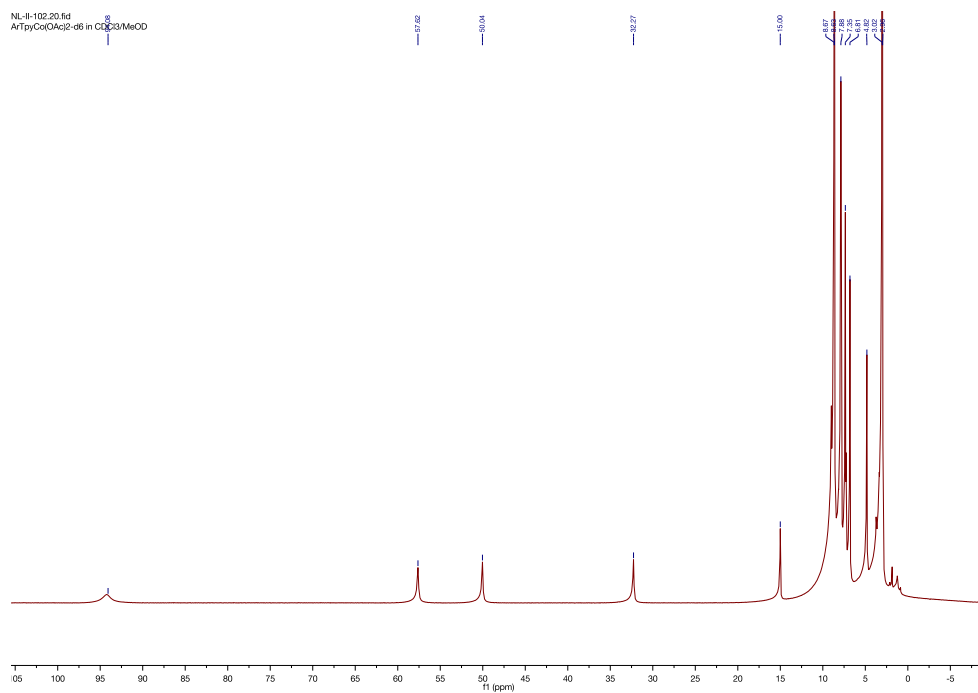

**Figure S2.** CDCl<sub>3</sub> <sup>1</sup>H NMR spectrum of (<sup>4r</sup>Tpy)Co(OAc)<sub>2</sub>-d<sub>6</sub> at 23 °C.

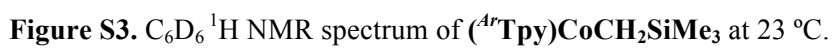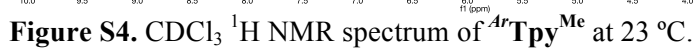

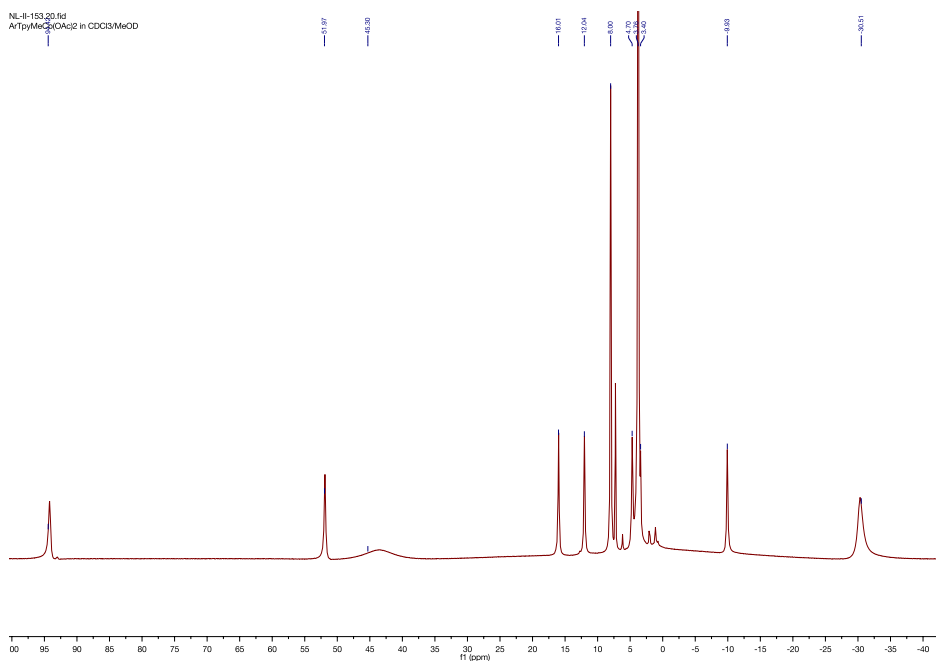

**Figure S5.**  $\text{CDCl}_3$   $^1\text{H}$  NMR spectrum of  $(^{\text{Ar}}\text{Tpy}^{\text{Me}})\text{Co}(\text{OAc})_2$  at 23 °C.

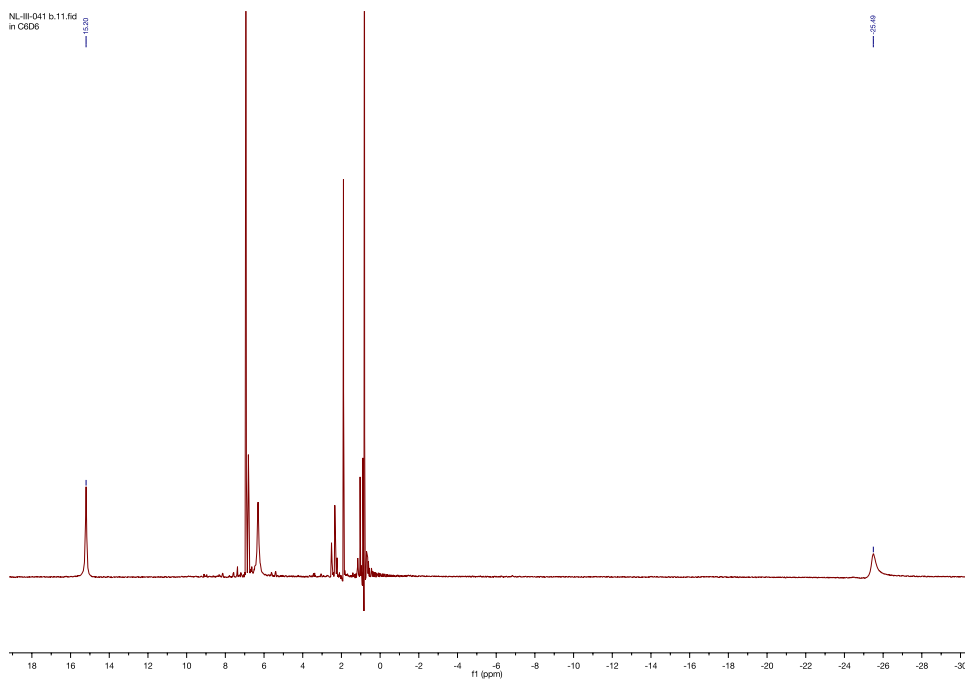

**Figure S6.**  $\text{C}_6\text{D}_6$   $^1\text{H}$  NMR spectrum of  $\text{Co}[\text{PinB}(\text{OAc})_2]_2$  at 23 °C. Peaks at 6-8 ppm correspond to free  $^{\text{Ar}}\text{Tpy}^{\text{Me}}$  ligand. Peaks at 0-2 ppm correspond to residual solvent.

**Table S1.** Reaction conditions: toluene (5.7 mmol), B<sub>2</sub>Pin<sub>2</sub> (0.38 mmol), catalyst (0.019 mmol, 5 mol%), 80 °C. Percent yields based on GC-FID using cyclooctane as an internal standard.

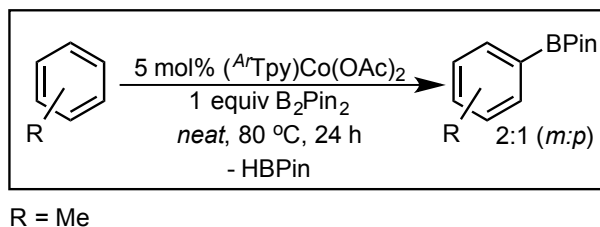

| <i>Alkoxide</i>              | <i>% yield</i> |
|------------------------------|----------------|
| 10 mol% LiOMe                | 80             |
| 100 mol% LiOMe               | 90             |
| 100 mol% NaOAc               | 53             |
| 100 mol% KO <sup>t</sup> Bu  | 75             |
| 100 mol% NaO <sup>t</sup> Bu | 69             |

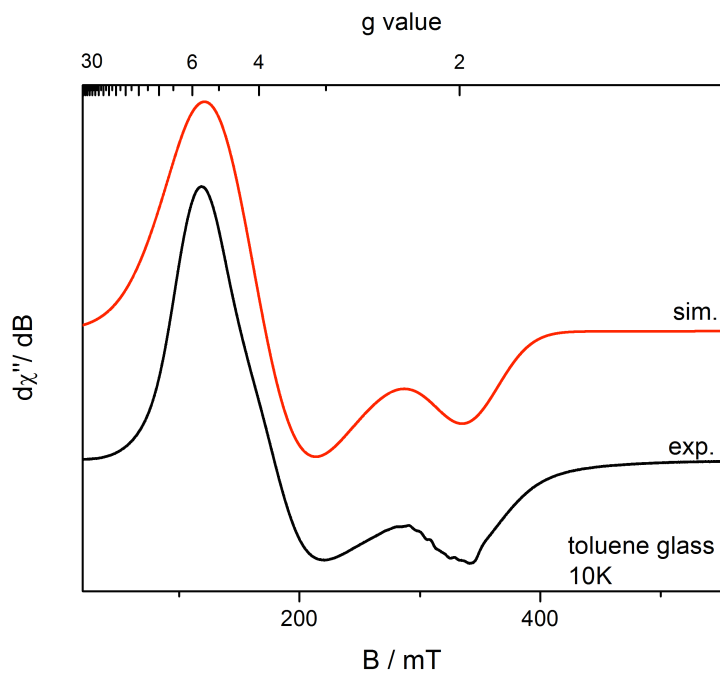

**Figure S7.** X-band EPR spectrum of (<sup>Ar</sup>Tpy)Co(OAc)<sub>2</sub> recorded in toluene glass at 10K. Microwave frequency = 9.378 GHz, power = 0.63 mW, modulation amplitude = 1 mT/100 kHz.; Spectroscopic parameters; g<sub>z</sub> = 5.66, g<sub>y</sub> = 5.59, g<sub>x</sub> = 1.99, H<sub>strain</sub> = (100, 10, 10), g<sub>strain</sub> = (1.71, 1.30, 0.37).

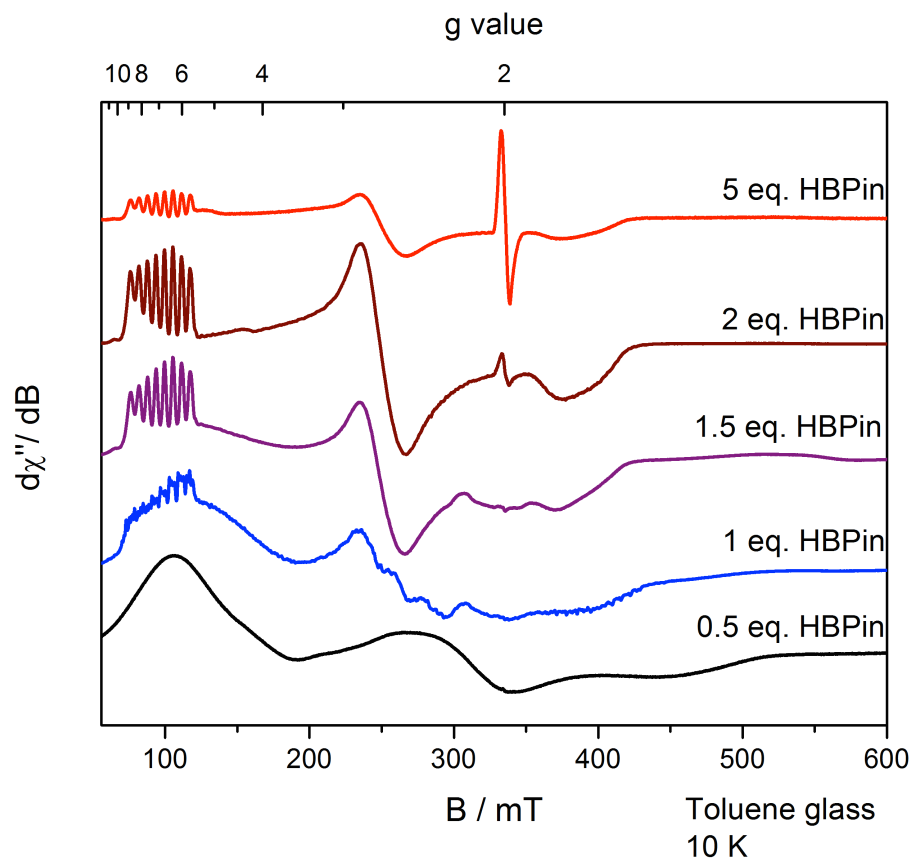

**Figure S8.** X-band EPR spectrum of ( $^{Ar}\text{Tpy}$ )Co(OAc) $_2$  plus x equivalents of HBPin recorded in toluene glass at 10K. Microwave frequency = 9.380 GHz, power = 2.0 mW, modulation amplitude = 1 mT/100 kHz.

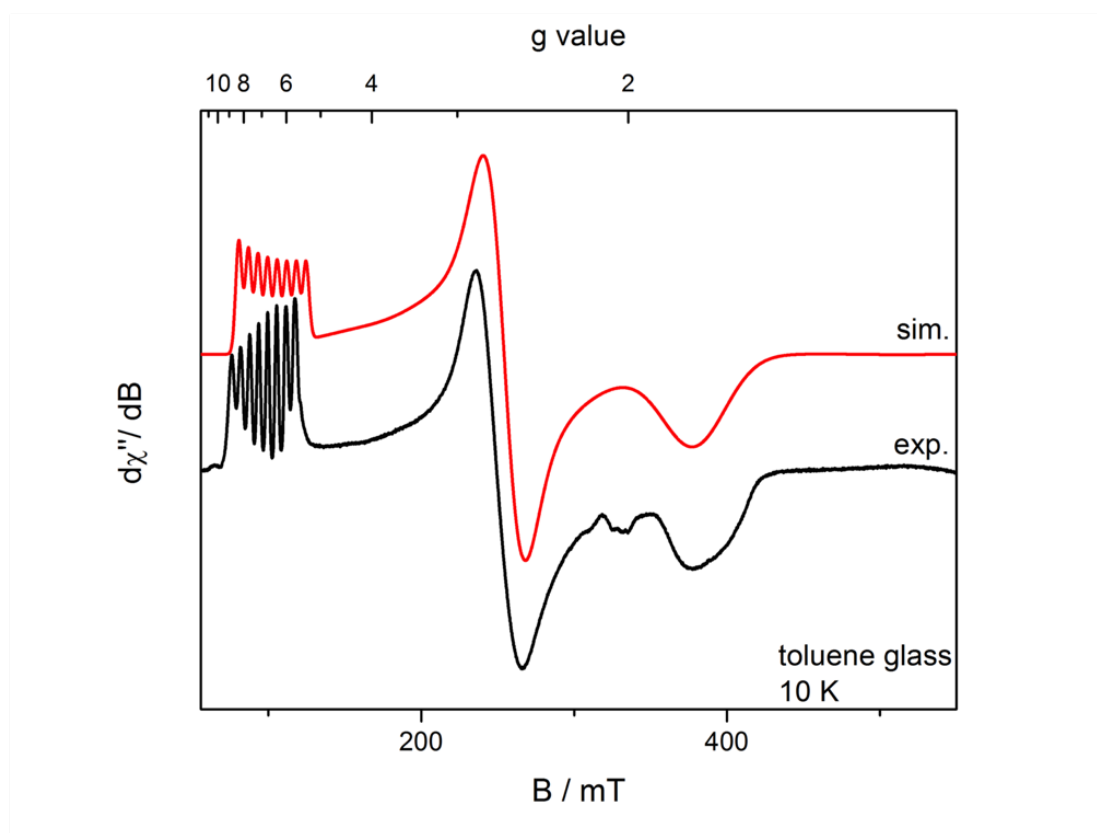

**Figure S9.** X-band EPR spectrum of  $\text{Co}[\text{PinB}(\text{OAc})_2]$  generated from addition of 2 equivalents HBPIn to  $(^{\text{Ar}}\text{Tpy}^{\text{Me}})\text{Co}(\text{OAc})_2$  in toluene at room temperature. Spectra collected at 10 K in toluene glass. Microwave frequency = 9.380 GHz, power = 2.0 mW, modulation amplitude = 1 mT/100 kHz. Simulation parameters for complex A:  $g_z = 1.99$ ,  $g_y = 2.66$ ,  $g_x = 2.04$ ,  $g_{\text{strain}} = (0.19, 0.01, 0.17)$ ,  $A_z = 225$  MHz,  $A_y = 1$  MHz,  $A_x = 1$  MHz,  $A_{\text{strain}} = (58, 0, 0)$ .

## II. Characterization Data for Borylation Products

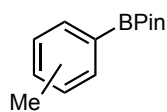

**(1a):** A mixture of isomers was isolated as an off-white solid (0.061 g, 80%)

following removal of excess solvent under reduced pressure, redissolving in  $\text{CDCl}_3$ , and filtration of the crude reaction mixture through a plug of silica in a Pasteur pipette. The *meta*:*para* ratio was determined to be 70:30 by integration of the characteristic peaks in the quantitative  $^{13}\text{C}$  NMR spectrum.  $\{^1\text{H}\}^{13}\text{C}$  NMR (chloroform- $d$ , 23 °C):  $\delta$  137.12, 135.34, 132.05, 131.78, 127.69, 83.14,

24.07, 21.27 (*meta*);  $\delta$  141.55, 134.81, 128.51, 83.77, 24.84, 21.73 (*para*). The  $^1\text{H}$  NMR and  $^{13}\text{C}$  NMR spectrum agree with previously reported data.<sup>1</sup>

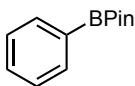

**(1b):** The excess solvent was removed under reduced pressure. The crude reaction mixture was dissolved in  $\text{CDCl}_3$ , passed through a plug of silica gel in a Pasteur pipette and then analyzed by  $^1\text{H}$  and  $^{13}\text{C}$  NMR spectroscopy without additional purification. The compound was isolated as a white solid (0.060 g, 84% yield) upon removal of solvent in vacuo.  $^1\text{H}$  NMR (chloroform-*d*, 23 °C):  $\delta$  7.82 (d,  $\Delta\nu_{1/2} = 7.31$  Hz, 2H), 7.45 – 7.36 (m, 3H), 1.35 (s, 12H).  $\{^1\text{H}\}^{13}\text{C}$  NMR (chloroform-*d*, 23 °C):  $\delta$  134.87, 131.39, 127.84, 83.91, 25.02.  $^1\text{H}$  and  $^{13}\text{C}$  NMR data agree with previously reported data.<sup>2</sup>

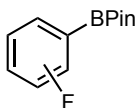

**(1c):** The excess solvent was removed under reduced pressure. The crude reaction mixture was dissolved in  $\text{CDCl}_3$ , passed through a plug of silica gel in a Pasteur pipette and then analyzed by  $^1\text{H}$  and  $^{13}\text{C}$  NMR spectroscopy without additional purification. The mixture of isomers were isolated as a white solid (0.055 g, 65% yield) upon removal of solvent in vacuo. The  $^1\text{H}$  NMR was not assigned since the proton resonances of the *meta* and *para* isomers overlap with each other. The *ortho*: *meta* ratio was determined to be 80:20 by integration of the characteristic peaks in the quantitative  $^{13}\text{C}$  NMR spectrum.  $\{^1\text{H}\}^{13}\text{C}$  NMR (chloroform-*d*, 23 °C):  $\delta$  168.17, 166.18, 137.02, 136.79, 133.32, 133.25, 123.58, 123.50, 115.34 115.15, 84.12, 24.50 (*ortho*).;  $\delta$  163.46, 161.50, 131.26, 130.30, 129.50, 129.44, 121.03, 120.88, 118.25, 118.09, 83.91, 24.84 (*meta*).  $^{13}\text{C}$  NMR data agree with previously reported data.<sup>3</sup>

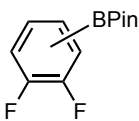

**(1d):** The crude reaction mixture was exposed to air to quench the catalyst and filtered through a plug of silica gel in a Pasteur pipette and then analyzed by  $^1\text{H}$  and  $^{13}\text{C}$  NMR spectroscopy without additional purification. NMR yield of the crude mixture was determined by

$^{19}\text{F}$  NMR using fluorobenzene as an external standard (70% yield). The  $^1\text{H}$  NMR was not assigned since the proton resonances of the 3- and 4- borylated isomers overlap with each other. The 3:4 ratio was determined to be 70:30 by integration of the characteristic peaks in the  $^{19}\text{F}$  NMR spectrum. A trace amount of *ortho* borylated fluorobenzene was observed in the  $^{19}\text{F}$  NMR, likely due to defluorination-borylation.  $\{^1\text{H}\}^{13}\text{C}$  NMR (chloroform-*d*, 23 °C):  $\delta$  154.5, 150.4, 131.1, 124.0, 120.78, 119.27, 117.83, 117.21, 83.72, 25.12 (3);  $\delta$  153.65, 153.57, 151.98, 151.90, 151.18, 151.10, 149.53, 149.45, 131.53, 123.96, 123.82, 116.84, 116.41, 84.19, 25.42. (4).  $^{13}\text{C}$  NMR data agree with previously reported data.<sup>4,5</sup>

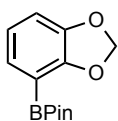

**(1e):** The crude reaction mixture was exposed to air to quench the catalyst and filtered through a plug of silica gel in a Pasteur pipette and then analyzed by  $^1\text{H}$  and  $^{13}\text{C}$  NMR spectroscopy without additional purification. NMR yield of the crude mixture was determined using cyclooctane as an external standard (90% yield).  $^1\text{H}$  NMR (chloroform-*d*, 23 °C):  $\delta$  7.21 (dd,  $J = 7.31$  Hz,  $J = 1.5$  Hz, 1H), 6.92 (dd,  $J = 7.31$  Hz,  $J = 1.1$  Hz 1H), 6.82 (t,  $J = 7.31$  Hz, 1H), 6.02 (s, 2H), 1.36 (s, 12H).  $\{^1\text{H}\}^{13}\text{C}$  NMR (chloroform-*d*, 23 °C):  $\delta$  152.54, 146.87, 127.82, 121.06, 111.16, 100.72, 83.91, 24.80.  $^1\text{H}$  and  $^{13}\text{C}$  NMR data agree with previously reported data.<sup>6</sup>

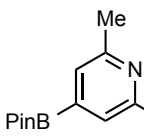

**(1f):** The compound was isolated (0.029 g, 32% yield) upon removal of solvent in vacuo.  $^1\text{H}$  NMR (chloroform-*d*, 23 °C):  $\delta$  7.31 (s, 2H), 2.52 (s, 6H), 1.35 (s, 12H).  $\{^1\text{H}\}^{13}\text{C}$  NMR (chloroform-*d*, 23 °C):  $\delta$  156.92, 125.16, 84.25, 24.74.  $^1\text{H}$  and  $^{13}\text{C}$  NMR data agree with previously reported data.<sup>7</sup>

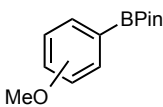

**(1g):** The crude reaction mixture was exposed to air to quench the catalyst and filtered through a plug of silica gel in a Pasteur pipette and then analyzed by  $^1\text{H}$  and  $^{13}\text{C}$  NMR

spectroscopy without additional purification. NMR yield of the crude mixture was determined using cyclooctane as an external standard (60% yield). The  $^1\text{H}$  NMR was not assigned since the proton resonances of the *meta* and *para* isomers overlap with each other. The *meta: para* ratio was determined to be 75:25 by integration of the characteristic peaks in the quantitative  $^{13}\text{C}$  NMR spectrum.  $\{^1\text{H}\}^{13}\text{C}$  NMR (chloroform-*d*, 23 °C):  $\delta$  159.20, 129.06, 128.61, 118.48, 117.42, 83.39, 54.46, 24.41 (*meta*).;  $\delta$  161.85, 136.54, 113.46, 83.39, 54.46, 24.41 (*para*).  $\delta$  164.19, 136.87, 132.54, 120.21, 110.06, 82.26, 59.91, 24.63 (*ortho*).  $^{13}\text{C}$  NMR data agree with previously reported data.<sup>8,9,10</sup>

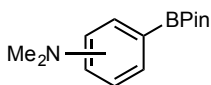

**(1h):** The crude reaction mixture was exposed to air to quench the catalyst and filtered through a plug of silica gel in a Pasteur pipette and then analyzed by  $^1\text{H}$  and  $^{13}\text{C}$  NMR spectroscopy without additional purification. NMR yield of the crude mixture was determined using cyclooctane as an external standard (67%yield). The  $^1\text{H}$  NMR was not assigned since the proton resonances of the *meta*, *para* and *ortho* isomers overlap with each other. The *meta: para: ortho* ratio was determined to be 75:25:trace by integration of the characteristic peaks in the quantitative  $^{13}\text{C}$  NMR spectrum.  $\{^1\text{H}\}^{13}\text{C}$  NMR (chloroform-*d*, 23 °C):  $\delta$  150.0, 128.94, 127.19, 118.65, 117.94, 83.18, 55.10, 24.54 (*meta*).;  $\delta$  159.01, 136.51, 113.3, 83.85, 55.26.1, 24.86 (*para*).  $^{13}\text{C}$  NMR data agree with previously reported data.<sup>11,12</sup>

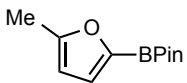

**(1i):** A 0.01 M solution of ( $^{Ar}$ Tpy)Co(OAc)<sub>2</sub> in 2-methylfuran was prepared. To a 10 mL reaction vial, 0.36 mL of the 0.01 M solution of ( $^{Ar}$ Tpy)Co(OAc)<sub>2</sub> (0.003 mmol catalyst) was added. The vial was also charged with a magnetic stir bar and 0.014 g (0.359 mmol) of LiOMe, and 0.091 g (0.359 mmol) of B<sub>2</sub>Pin<sub>2</sub>. The resulting mixture was heated in an oil bath at 80 °C for 36 hours. The crude reaction mixture was dissolved in hexane and the resulting solution was passed through a plug of silica gel in a Pasteur pipette to remove the catalyst. The title

compound was isolated as a colorless oil (0.074 g, 98% yield) upon removal of solvent in vacuo.

$^1\text{H}$  NMR (chloroform-*d*, 23 °C):  $\delta$  6.94 (d,  $\Delta\nu_{1/2}$  = 3.07 Hz, 1H), 5.99 (d,  $\Delta\nu_{1/2}$  = 3.07 Hz, 1H), 2.30 (s, 3H), 1.29 (s, 12H).  $\{^1\text{H}\}^{13}\text{C}$  NMR (chloroform-*d*, 23 °C):  $\delta$  157.58, 124.80, 106.87, 83.90, 24.66, 13.83.  $^1\text{H}$  and  $^{13}\text{C}$  NMR data agree with previously reported data.<sup>13</sup>

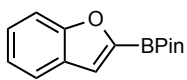

**(1j)**: Isolated as a white solid (0.081 g, 88%).  $^1\text{H}$  NMR (chloroform-*d*, 23 °C):  $\delta$  7.63 (d,  $\Delta\nu_{1/2}$  = 7.91 Hz, 1H), 7.57 (d,  $\Delta\nu_{1/2}$  = 7.90 Hz, 1H), 7.40 (s, 1H), 7.34 (ddd,  $\Delta\nu_{1/2}$  = 8.4, 7.2, 1.3 Hz, 1H), 7.25 – 7.21 (m, 1H), 1.39 (s, 12H).  $\{^1\text{H}\}^{13}\text{C}$  NMR (chloroform-*d*, 23 °C):  $\delta$  157.54, 127.49, 125.95, 122.73, 121.90, 119.56, 111.99, 84.71, 24.81.  $^1\text{H}$  and  $^{13}\text{C}$  NMR data agree with previously reported data.<sup>14</sup>

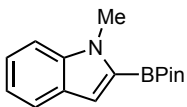

**(1k)**: Isolated as a white solid (0.058 g, 60%).  $^1\text{H}$  NMR (chloroform-*d*, 23 °C):  $\delta$  7.64 (d,  $\Delta\nu_{1/2}$  = 8.05 Hz, 1H), 7.07 – 7.36 (m, 5H), 3.98 (s, 3H), 1.37 (s, 12H).  $\{^1\text{H}\}^{13}\text{C}$  NMR (chloroform-*d*, 23 °C):  $\delta$  140.14, 127.84, 123.17, 121.60, 119.29, 114.24, 109.69, 83.70, 32.25, 24.86.  $^1\text{H}$  and  $^{13}\text{C}$  NMR data agree with previously reported data.<sup>15</sup>

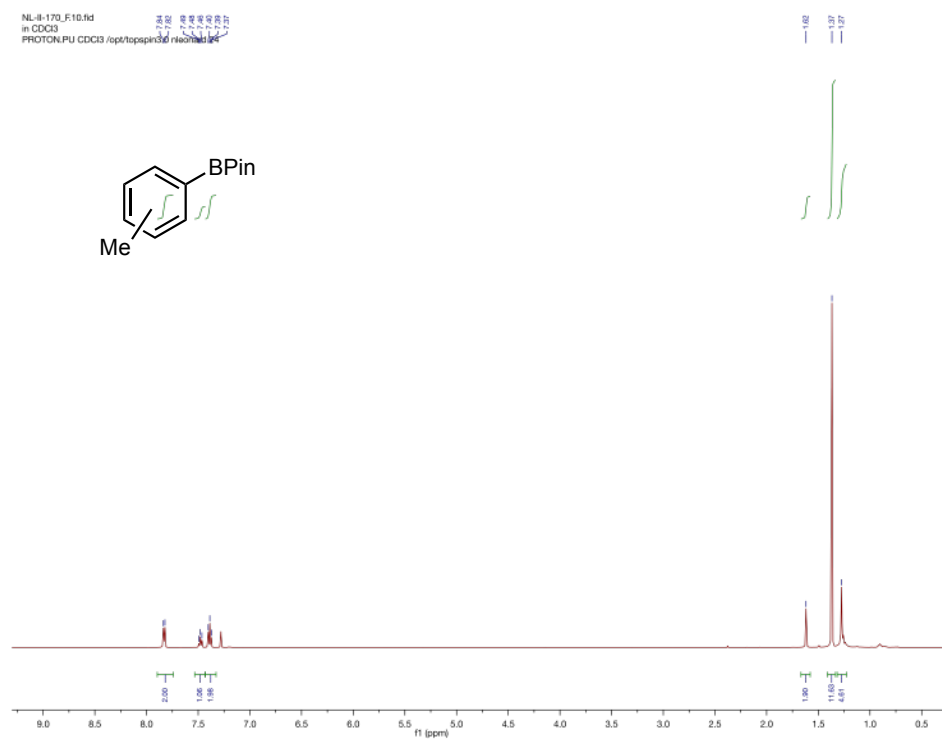

**Figure S10.** <sup>1</sup>H NMR spectrum of **1a** in CDCl<sub>3</sub> at 23 °C.

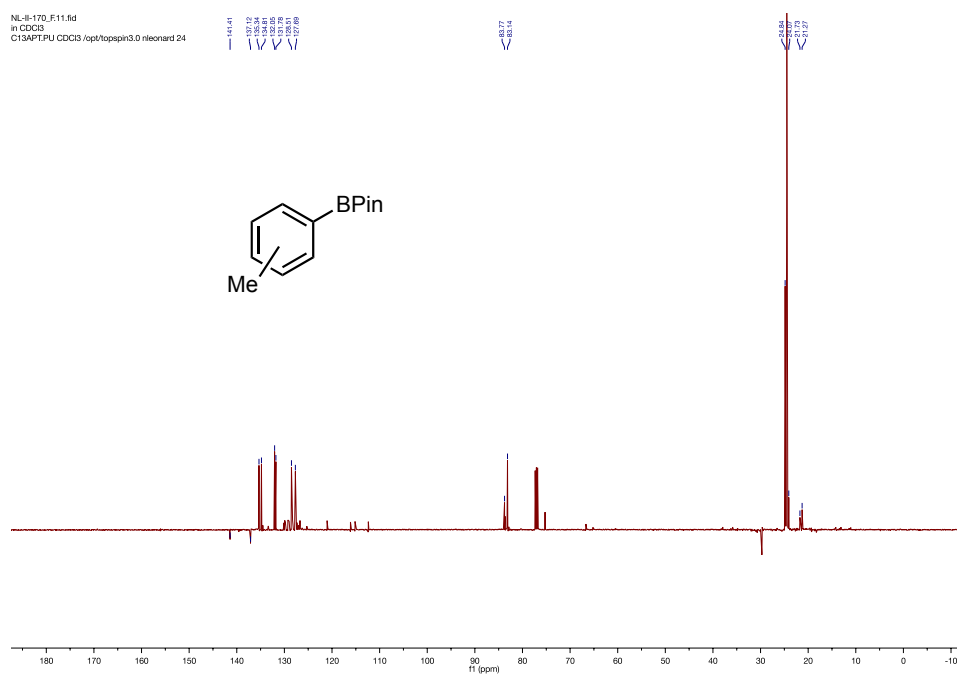

**Figure S11.** <sup>13</sup>C NMR spectrum of **1a** in CDCl<sub>3</sub> at 23 °C.

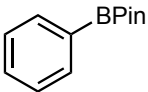

c1ccccc1BPin  
 NL-1170\_E11.fid  
 in CDCl3  
 C13APT.PU CDCl3 /ap01sp010.0 nlsdard 43

134.47  
 131.59  
 127.46  
 83.91  
 76.00  
 25.08

S13

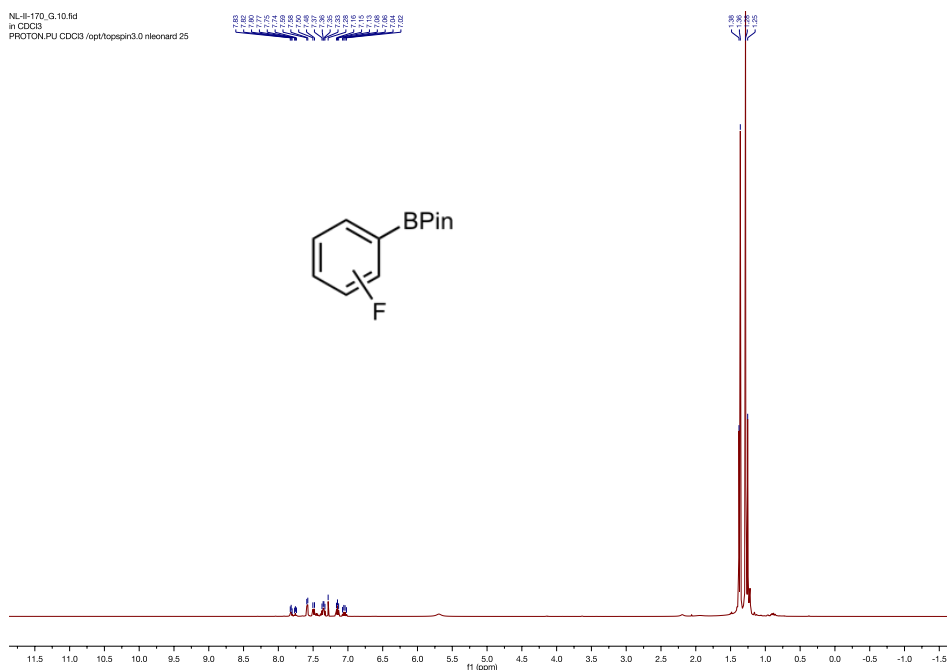

**Figure S14.** <sup>1</sup>H NMR spectrum of **1c** in CDCl<sub>3</sub> at 23 °C.

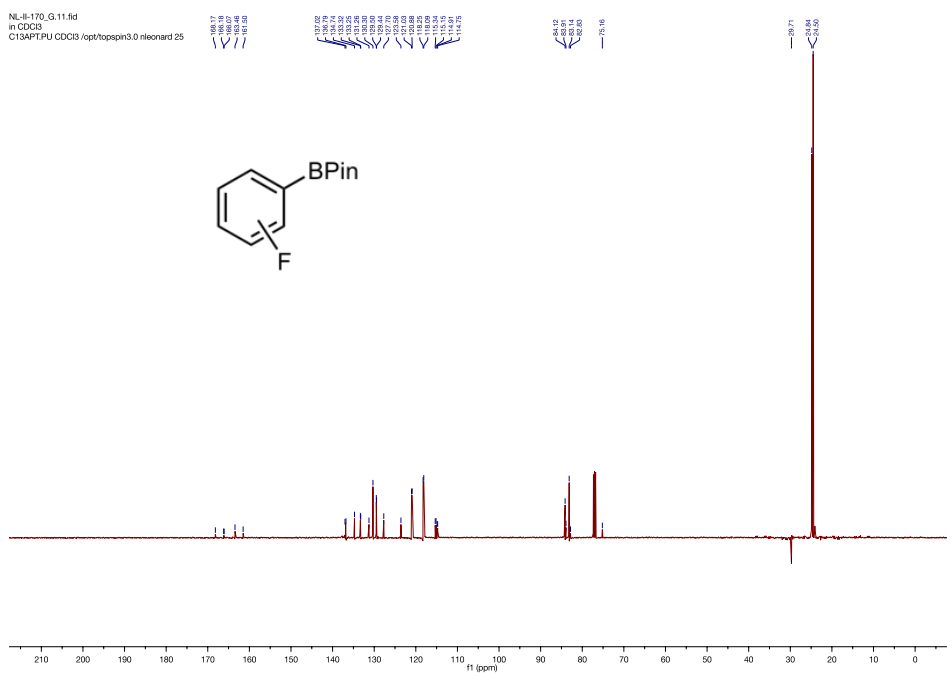

**Figure S15.** <sup>13</sup>C NMR spectrum of **1c** in CDCl<sub>3</sub> at 23 °C.

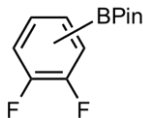

Fc1ccccc1F

S15

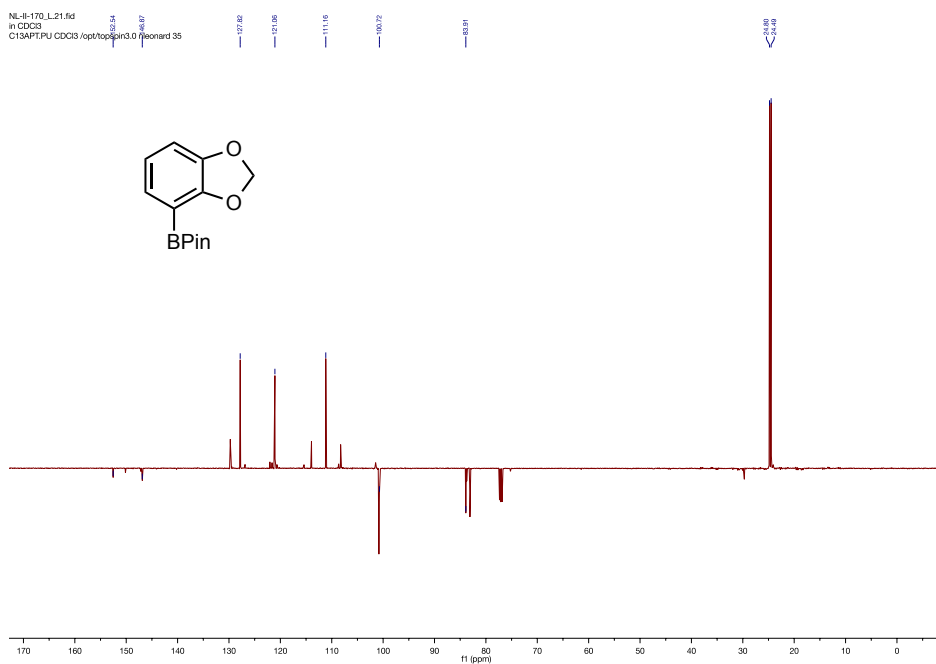

**Figure S18.**  $^{13}\text{C}$  NMR spectrum of crude reaction mixture of **1e** in  $\text{CDCl}_3$  at 23 °C.

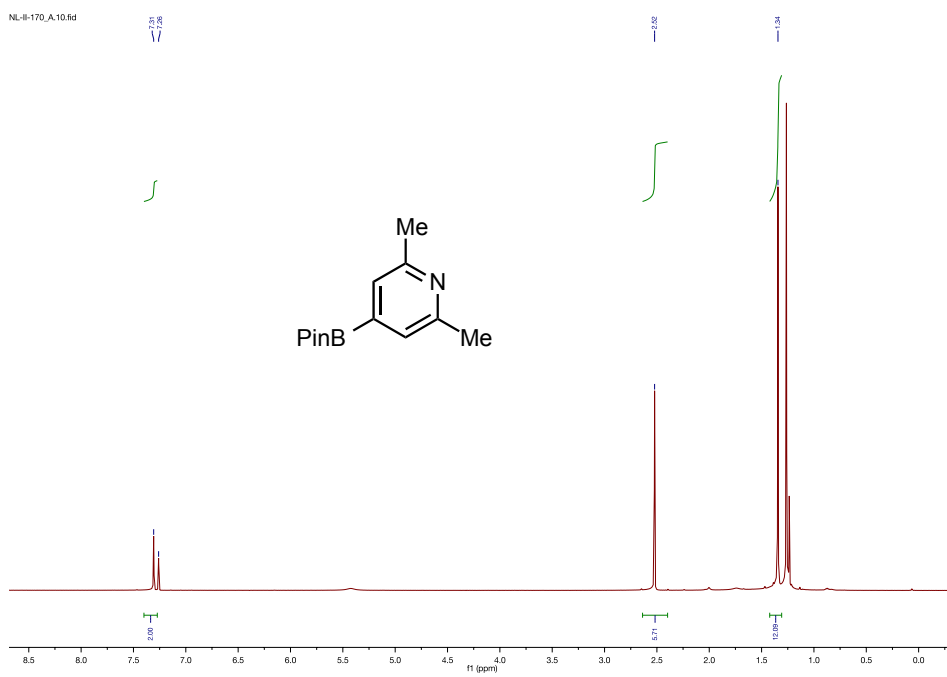

**Figure S19.**  $^1\text{H}$  NMR spectrum of **1f** in  $\text{CDCl}_3$  at 23 °C.

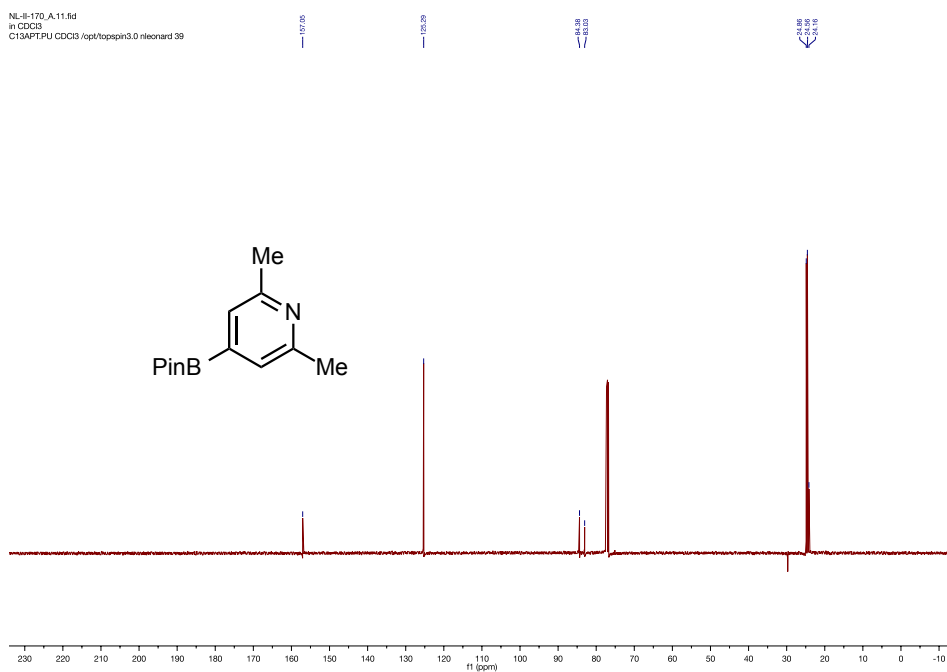

**Figure S20.** <sup>13</sup>C NMR spectrum of **1f** in CDCl<sub>3</sub> at 23 °C.

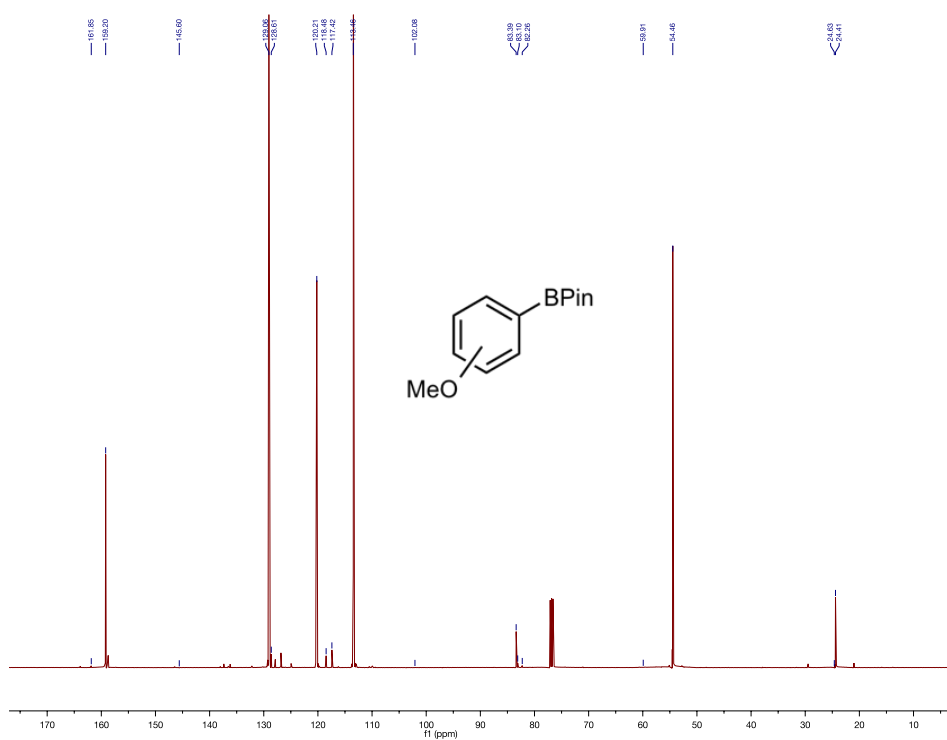

**Figure S21.** <sup>13</sup>C NMR spectrum of crude reaction mixture of **1g** in CDCl<sub>3</sub> at 23 °C.

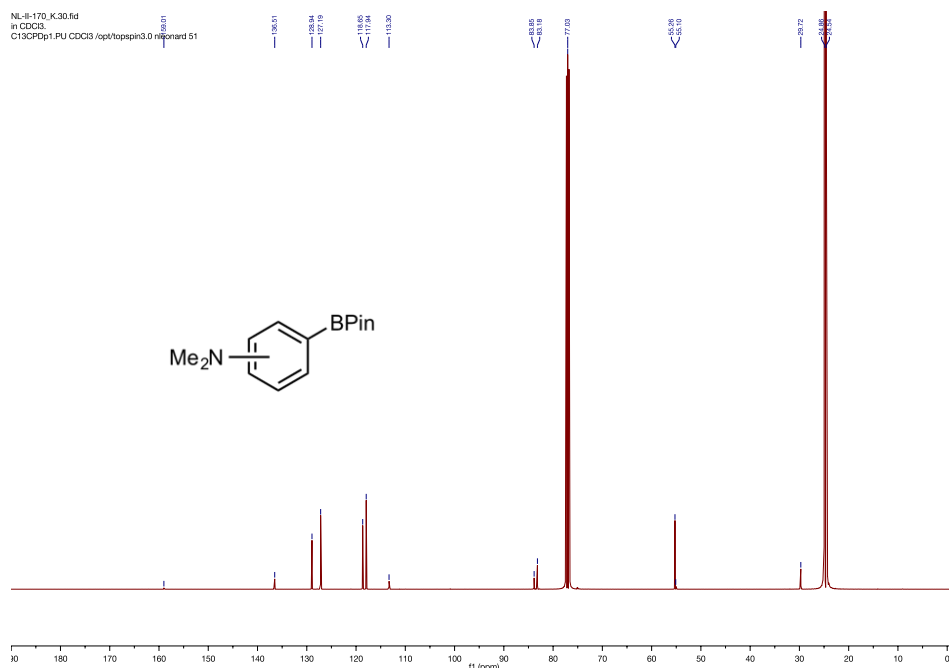

**Figure S22.** <sup>13</sup>C NMR spectrum of crude reaction mixture of **1h** in CDCl<sub>3</sub> at 23 °C.

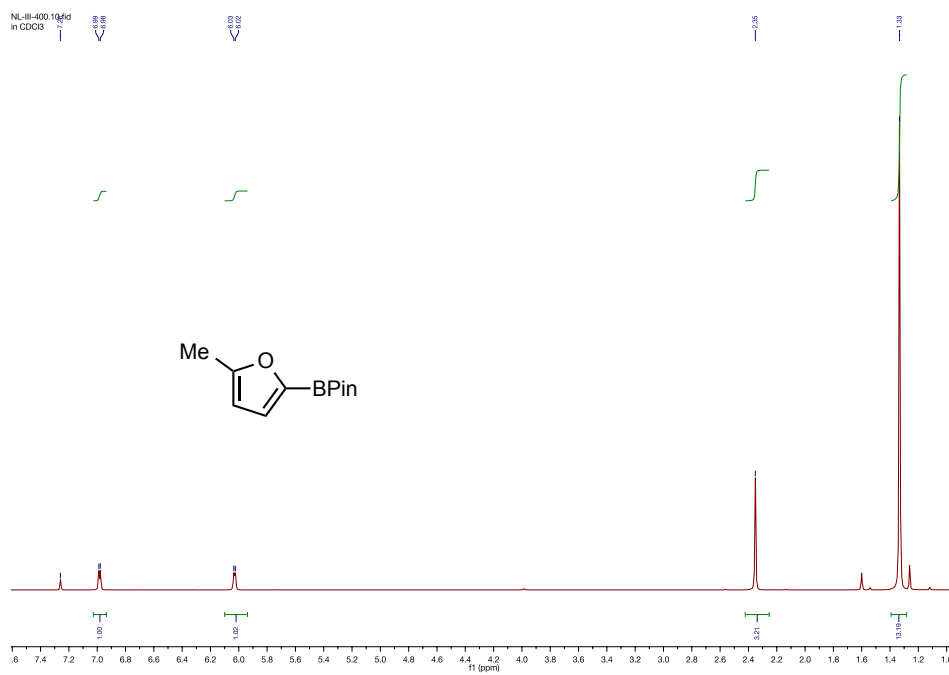

**Figure S23.** <sup>1</sup>H NMR spectrum of **1i** CDCl<sub>3</sub> at 23 °C.



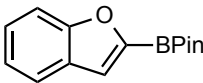

<sup>1</sup>H NMR spectrum (400 MHz, CDCl<sub>3</sub>) of compound 10. The chemical structure of 1-methyl-2-(4,4,5,5-tetramethyl-1,3-dioxol-2-yl)indole is shown above the spectrum. The spectrum displays peaks in the aromatic region (6.8-7.5 ppm) and a singlet for the methyl group (3.9 ppm). Integration values are provided below the baseline.

| Chemical Shift (ppm) | Integration |
|----------------------|-------------|
| 7.45 (d)             | 1.00        |
| 7.35 (d)             | 1.00        |
| 7.25 (m)             | 0.94        |
| 7.15 (m)             | 1.10        |
| 3.90 (s)             | 3.04        |

**Figure S27.**  $^1\text{H}$  NMR spectrum of **1k** in  $\text{CDCl}_3$  at 23  $^\circ\text{C}$ .



### III. References

- <sup>1</sup> Chow, W. K.; Yuen, O. Y.; So, C. M.; Wong, W. T.; Kwong F. Y. *J. Org. Chem.* **2012**, *77*, 3543.
- <sup>2</sup> Murata, M.; Oyama, T.; Watanabe, S.; Masuda, Y. *J. Org. Chem.* **2000**, *65*, 164.
- <sup>3</sup> Qiu, D.; Jin, L.; Zheng, Z.; Meng, H.; Mo, F.; Wang, X.; Zhang, Y.; Wang, J. *J. Org. Chem.* **2013**, *78*, 1923.
- <sup>4</sup> Zhou, J.; Kuntze-Fechner, M. W.; Bertermann, R.; Paul, U. S. D.; Berthel, J. H. J.; Friedrich, A.; Du, Z.; Marder, T. B.; Radius, U. *J. Am. Chem. Soc.* **2016**, *138*, 5250.
- <sup>5</sup> Guerrand, H. D. S.; Marciasini, L. D.; Jousseau, M.; Vaultier, M.; Pucheault, M. *Chem. Eur. J.* **2014**, *20*, 5573.
- <sup>6</sup> Vanchura, II, B. A.; Preshlock, S. M.; Roosen, P. C.; Kallepalli, V. A.; Staples, R. J.; Maleczka, Jr., R. E.; Singleton, D. A.; Smith, III, *Chem. Commun.* **2010**, *46*, 7724.
- <sup>7</sup> Harrisson, P.; Morris, J.; Marder, T. B.; Steel, P. G. *Org. Lett.* **2009**, *11*, 3586.
- <sup>8</sup> Zhu, C.; Yamane, M. *Org. Lett.* **2012**, *14*, 4560.
- <sup>9</sup> Mo, F.; Jiang, Y.; Qui, D.; Zhang, Y.; Wang, J. *Angew. Chem. Int. Ed.* **2010**, *49*, 1846.
- <sup>10</sup> Billingsley, K. L.; Buchwald, S. L. *J. Org. Chem.* **2008**, *73*, 5589.
- <sup>11</sup> Yao, W.; Fang, H.; Peng, S.; Wen, H.; Zhang, L.; Hu, A.; Huang, Z. *Organometallics* **2016**, *35*, 1559.
- <sup>12</sup> Kinuta, H.; Tobisu, M.; Chatani, N. *J. Am. Chem. Soc.* **2015**, *137*, 1593.
- <sup>13</sup> Obligacion, J. V.; Semproni, S. P.; Chirik, P. J. *J. Am. Chem. Soc.* **2014**, *136*, 4133.
- <sup>14</sup> Ishida K.; Ishiyama, T.; Miyaura, N. *Tetrahedron* **2001**, *57*, 9813.
- <sup>15</sup> Mertins, K.; Zapf, A.; Beller, M. *J. Mol. Catal.* **2004**, *207*, 21.
